# Supplementary material for: Self-supervised pseudo-colorizing of masked cells
Source: PubMed Central journal article supplement (PMC10449109; doi:10.1371/journal.pone.0290561), 2023-08-24
Supplement: pone.0290561.s001.pdf [file pone.0290561.s001.pdf]

# Rebuttal letter: Self-supervised pseudo-colorizing of masked cells

## Response to reviewers

**Reviewer 1:** Thank you for your feedback.

**Reviewer 2:** Thank you for your feedback. Below are our responses to the points you raised during the review.

**P:** There are various datasets used and the reason behind using data augmentation is not clear.

**R:** We use only the simulated datasets for evaluation to use a perfect ground truth, since the other datasets do not contain perfect annotations, but mainly silver truth annotations generated from previous challenge submissions (see: <http://celltrackingchallenge.net/annotations>). However, we pre-compute the augmented samples to train all methods on the same data and make the comparison as fair as possible.

**P:** The computational complexity of the proposed method seems high.

**R:** We assume that you are referring to the higher computational complexity of our method compared to a vanilla masked autoencoder (MAE). MAE has a lower computational complexity since the vision transformer (ViT) used as encoder is only applied to non-masked patches whereas the EfficientNet backbone in our model is applied to both masked and non-masked patches. Therefore, we additionally implemented a version of our CellCentroidFormer model with a ViT backbone to combine vanilla masked autoencoding with pseudo-colorizing and achieve the same computational efficiency. We added the results to Table 2, adjusted Fig 2, and published the code at: <https://github.com/roydenwa/pseudo-colorize-masked-cells>
